# Supplementary material for: Application of Multi-Dimensional Intelligent Visual Quantitative Assessment System to Evaluate Hand Function Rehabilitation in Stroke Patients
Source: MDPI journal article supplement (doi:10.3390/brainsci12121698), 2022-12-10
Supplement: s1 [file s1]

**Supplementary Table S1.** Consistency of the MDIVQAS for repeated measures to assess hand function.

| <b>Movement (n = 24)</b>       | <b>First measurement</b> | <b>Second measurement</b> | <b>Third measurement</b> | <b>F</b> | <b>p</b> |
|--------------------------------|--------------------------|---------------------------|--------------------------|----------|----------|
| Wrist ulnar deviation          | 23.00 (4.75 - 32.75)     | 21.50 (6.25 - 32.75)      | 19.50 (4.75 - 30.75)     | 0.326    | 0.711    |
| Wrist dorsiextension           | 35.50 (21.25 - 43.50)    | 36.50 (15.75 - 43.50)     | 32.50 (20.50 - 44.75)    | 2.489    | 0.098    |
| Finger adduction and abduction | 113.00 (58.00 - 146.75)  | 98.00 (62.25 - 149.25)    | 119.00 (43.75 - 139.25)  | 0.430    | 0.643    |
| Forearm pronation              | 82.50 (25.50 - 88.00)    | 83.00 (27.00 - 86.75)     | 79.00 (22.00 - 87.00)    | 0.976    | 0.374    |
| Forearm supination             | 81.00 (13.00 - 88.00)    | 79.00 (10.50 - 88.00)     | 78.00 (14.50 - 88.00)    | 1.666    | 0.204    |
| Cylindrical grip               | 13.00 (4.50 - 19.75)     | 12.50 (4.75 - 19.00)      | 14.00 (5.25 - 21.00)     | 2.858    | 0.071    |
| Spherical grip                 | 36.00 (7.00 - 69.50)     | 39.00 (9.25 - 64.75)      | 38.50 (5.00 - 65.75)     | 0.214    | 0.753    |
| Thumb abduction                | 15.00 (4.50 - 23.75)     | 16.50 (3.75 - 22.75)      | 17.00 (5.50 - 23.00)     | 3.348    | 0.120    |
| Thumb flexion and extension    | 44.00 (12.25 - 65.00)    | 43.50 (9.25 - 62.75)      | 41.00 (11.50 - 63.75)    | 0.066    | 0.925    |
| Thumb rotation                 | 28.00 (10.00 - 39.75)    | 24.00 (7.75 - 38.00)      | 27.50 (10.00 - 37.25)    | 3.603    | 0.045*   |

Note: \* $p < 0.05$ .**Supplementary Table S2.** Correlation between MDIVQAS and FMA-W/H, Brunnstrom (hand), and ARAT

| <b>Evaluation methods</b>                                              | <b>FMA-UE<br/>(n = 82)</b> | <b>FMA-<br/>W/H<br/>(n = 82)</b> | <b>Brunnstrom<br/>(hand)<br/>(n = 72)</b> | <b>ARAT<br/>(n = 36)</b> |
|------------------------------------------------------------------------|----------------------------|----------------------------------|-------------------------------------------|--------------------------|
| Multi-dimensional intelligent visual<br>quantitative assessment system | 0.690**                    | 0.796**                          | 0.895**                                   | 0.747**                  |
| Correlation coefficient (R)                                            |                            |                                  |                                           |                          |
| <i>p</i>                                                               | 0.000                      | 0.000                            | 0.000                                     | 0.000                    |

Note: \* $p < 0.05$ , \*\* $p < 0.01$ .**Supplementary Table S3.** Correlations between MDIVQAS and protractor measurement.

| <b>Movement</b>                              | <b>r</b> | <b>p</b> |
|----------------------------------------------|----------|----------|
| Forearm pronation (n=81)                     | 0.974**  | 0.000    |
| Forearm supination (n=81)                    | 0.973**  | 0.000    |
| Ulnar deviation of wrist (n=81)              | 0.763**  | 0.000    |
| wrist dorsiextension (n=81)                  | 0.790**  | 0.000    |
| Finger adduction and abduction1 (n=37)       | 0.832**  | 0.000    |
| Finger adduction and abduction2 (n=37)       | 0.916**  | 0.000    |
| Finger adduction and abduction3 (n=37)       | 0.748**  | 0.000    |
| Finger adduction and abduction4 (n=37)       | 0.815**  | 0.000    |
| Sum of finger adduction and abduction (n=37) | 0.908**  | 0.000    |

Note: \* $p < 0.05$ , \*\* $p < 0.01$ ; finger adduction abduction 1: angle between the thumb and index finger of the affected hand, finger adduction and abduction 2: angle between the index finger and the middle finger of the affected hand, finger adduction and abduction 3: angle between the middle finger and the ring finger of the affected hand, finger adduction and abduction 4: angle between the ring finger and the little finger of the affected hand.

**Supplementary Table S4.** Comparison of differences between FMA-UE, FMA-W/H, Brunnstrom and ARAT before and after treatment.

|                         | Before the treatment<br>(n = 46) | After treatment<br>(n = 46) | t        | p values | 95%CI          |
|-------------------------|----------------------------------|-----------------------------|----------|----------|----------------|
| FMA-UE                  | 39.67±15.977                     | 48.44±17.118                | -4.233** | 0.003    | -13.559~-3.996 |
| FMA-W/H                 | 14.00±6.500                      | 17.78±7.965                 | -3.640** | 0.007    | -6.171~-1.384  |
| Brunnstrom (hand)       | 3.07±1.597                       | 3.87±1.771                  | -7.284** | 0.000    | -1.027~-7.284  |
| Brunnstrom (upper limb) | 3.46±1.361                       | 4.24±1.369                  | -7.622** | 0.000    | -0.989~-0.576  |
| ARAT                    | 40.00±17.692                     | 44.00±18.486                | -2.502*  | 0.037    | -7.686~-0.314  |

Note:\*p < 0.05,\*\*p < 0.01.

**Supplementary Table S5.** Comparison the differences of the AROM in finger adduction and abduction. With protractor before and after rehabilitation treatment

| Movement                              | Before treatment<br>(n = 37) | After treatment<br>(n = 37) | Z       | p values |
|---------------------------------------|------------------------------|-----------------------------|---------|----------|
| Finger adduction and abduction 1      | 10 (0 to 40)                 | 25 (0 to 48)                | 3.157** | 0.002    |
| Finger adduction and abduction 2      | 5 (0 to 20)                  | 15 (0 to 23)                | 2.905** | 0.004    |
| Finger adduction and abduction 3      | 5 (0 to 12.5)                | 6 (0 to 17)                 | 2.766** | 0.006    |
| Finger adduction and abduction 4      | 2 (0 to 20)                  | 15 (0 to 22.5)              | 2.747** | 0.006    |
| Sum of finger adduction and abduction | 32 (0 to 152)                | 100 (0 to 166)              | 3.971** | 0.000    |

Note:\*\*p < 0.01, finger adduction abduction 1: angle between the thumb and index finger of the affected hand, finger adduction and abduction 2: angle between the index finger and the middle finger of the affected hand, finger adduction and abduction 3: angle between the middle finger and the ring finger of the affected hand, finger adduction and abduction 4: angle between the ring finger and the little finger of the affected hand. Z represents the effect size of the two-sample K-S test.

**Supplementary Table S6.** Comparison of differences before and after rehabilitation treatment using MDIVQAS

| action                                | Before the treatment<br>(n = 47) | After treatment<br>(n = 47) | Z       | p values |
|---------------------------------------|----------------------------------|-----------------------------|---------|----------|
| Wrist ulnar deviation                 | 48.39 (14.78-65.58)              | 46.15 (10.34-70.27)         | 2.621** | 0.008    |
| Wrist dorsioextension                 | 47.21 (14.46 to 74.52)           | 61.29 (20.41-84.62)         | 2.961** | 0.002    |
| Forearm pronation                     | 91.48 (41.19 to 100.00)          | 86.36 (40.91 ~ 100.00)      | 2.233*  | 0.024    |
| Forearm supination                    | 80.11 (13.75 to 100.00)          | 88.75 (8.11 ~ 100.00)       | 3.393** | 0.001    |
| Cylindrical grip                      | 46.59 (16.19 to 74.32)           | 58.33 (23.53-83.87)         | 3.852** | 0.000    |
| Spherical grip                        | 45.36 (11.42 to 75.55)           | 69.40 (14.73-87.73)         | 2.839** | 0.004    |
| Thumb abduction                       | 40.67 (20.63 to 68.34)           | 58.97 (8.33-82.14)          | 2.177*  | 0.029    |
| Thumb flexion and extension           | 95.09 (32.42 to 146.20)          | 100.52 (12.55 ~ 159.70)     | 2.788** | 0.005    |
| Thumb rotation                        | 54.25 (15.94 to 84.22)           | 66.33 (15.93-85.54)         | 2.904** | 0.004    |
| Finger adduction and abduction 1      | 31.82 (6.85 to 69.99)            | 45.64 (12.44 ~ 91.48)       | 3.077** | 0.002    |
| Finger adduction and abduction 2      | 25.00 (9.55 to 62.50)            | 43.99 (13.84 ~ 83.75)       | 2.178*  | 0.029    |
| Finger adduction and abduction 3      | 25.93 (7.28 to 51.19)            | 50.84 (8.08 to 69.11)       | 3.115** | 0.002    |
| Finger adduction and abduction 4      | 32.50 (6.07 to 56.02)            | 47.81 (12.26 ~ 68.61)       | 2.510*  | 0.012    |
| Sum of finger adduction and abduction | 195.47 (37.55 to 329.37)         | 286.10 (53.59 ~ 400.46)     | 3.554** | 0.000    |

Note:\*p < 0.05,\*p < 0.01.
